# Supplementary material for: Deep Sequencing Reveals Low Incidence of Endogenous LINE-1 Retrotransposition in Human Induced Pluripotent Stem Cells
Source: PLoS One. 2014 Oct 7;9(10):e108682. doi: 10.1371/journal.pone.0108682 (PMC4188539; doi:10.1371/journal.pone.0108682)
Supplement: Table S1 — Summary of total sequences obtained after 454 sequencing and depth coverage. (XLSX) [file pone.0108682.s002.xlsx]

## Sheet: Sheet1
	hiPS#11	hiPS#19	hiPS#7	HFF	Average
# of sequences	67934	55850	54728	43838	55588
Coverage	47.4x	35.7x	39.6x	32.2x	38.7x
